# Supplementary material for: Decoding critical long non-coding RNA in ovarian cancer epithelial-to-mesenchymal transition
Source: PubMed Central journal article supplement (PMC5693921; doi:10.1038/s41467-017-01781-0), 2017-11-17
Supplement: 41467_2017_1781_MOESM1_ESM.pdf [file 41467_2017_1781_MOESM1_ESM.pdf]

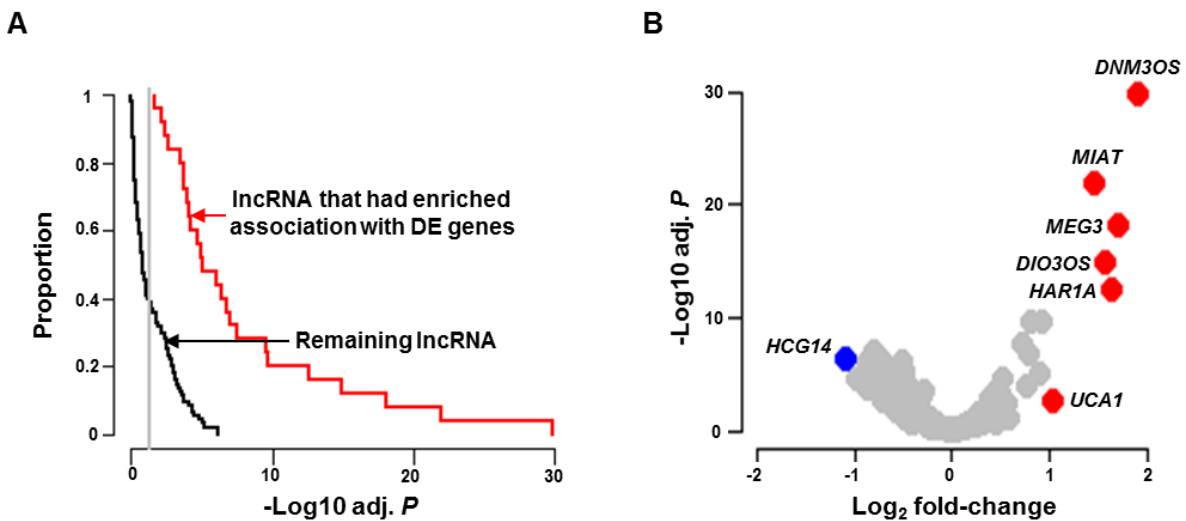

**Supplementary Figure 1. LncRNA differentially expressed in EMT.** A) Distribution of differential expression  $P$  values of 25 lncRNA inferred from the linear regression model (red line) and the remaining lncRNA (black line). X-axis represents significance level of differential expression. Y-axis represents proportion of lncRNA that are significantly differentially expressed. Grey vertical line represents adjusted  $P$  value threshold of 0.05 (i.e. 1.301 in  $-\log_{10}$  scale). B) Seven lncRNA had at least 2 fold expression changes with adjusted  $P < 0.05$  in the mesenchymal subtype compared to the epithelial subtype. Red and blue dots represent significantly up- and down-regulated lncRNA, respectively. Remaining lncRNA are represented by grey dots. For A and B,  $P$  values determined by BH adjusted two-tailed t-test.

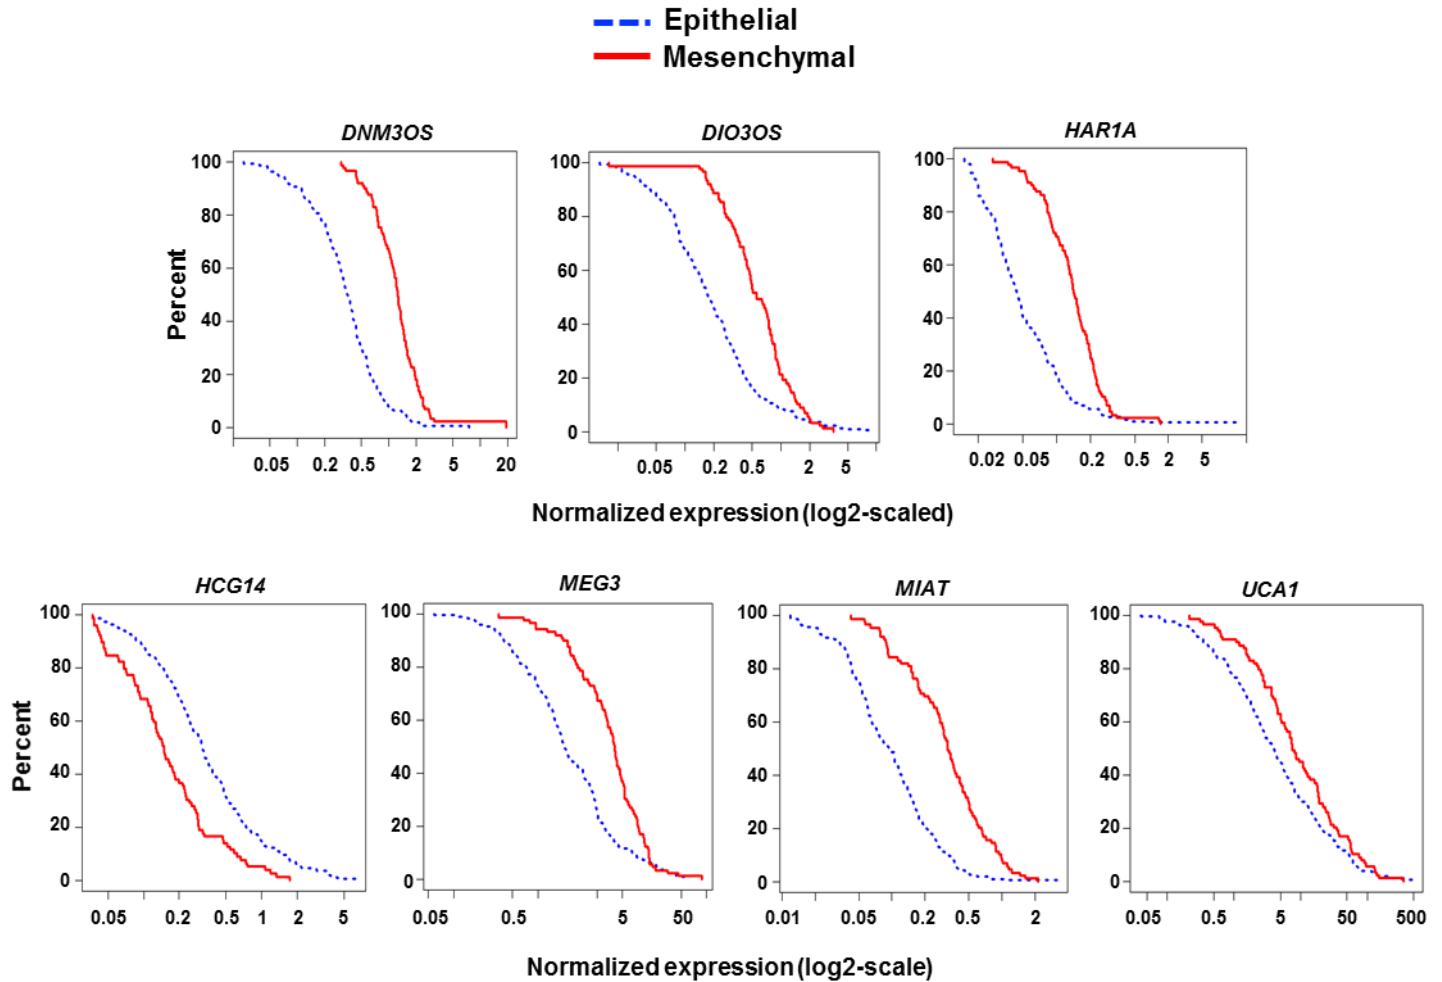

**Supplementary Figure 2. Empirical cumulative distribution of lncRNA expression in epithelial and mesenchymal subtypes in TCGA cohort.** Distribution of seven lncRNA expression in two ovarian cancer subtypes. X-axis represents normalized expression of indicated lncRNA. Y-axis estimates percentage of patient sample at or below a given value of lncRNA expression.

A

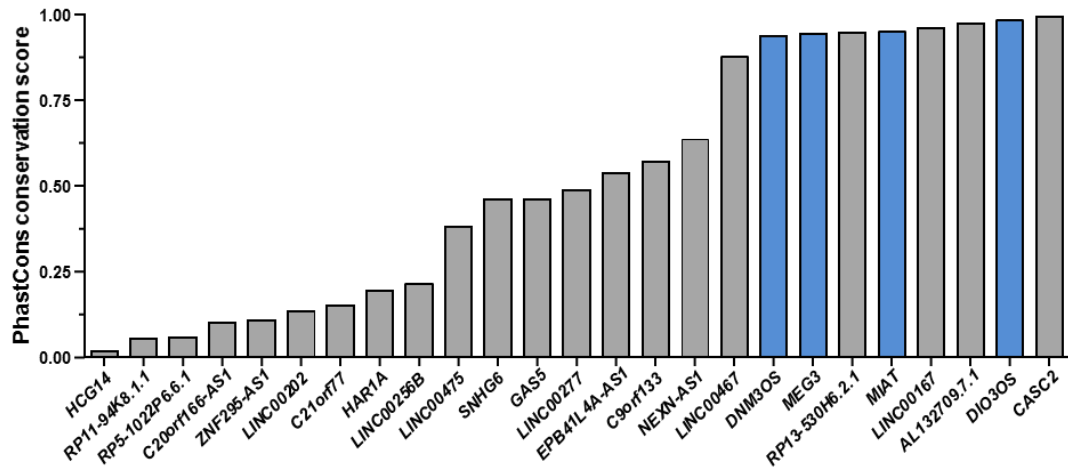

B

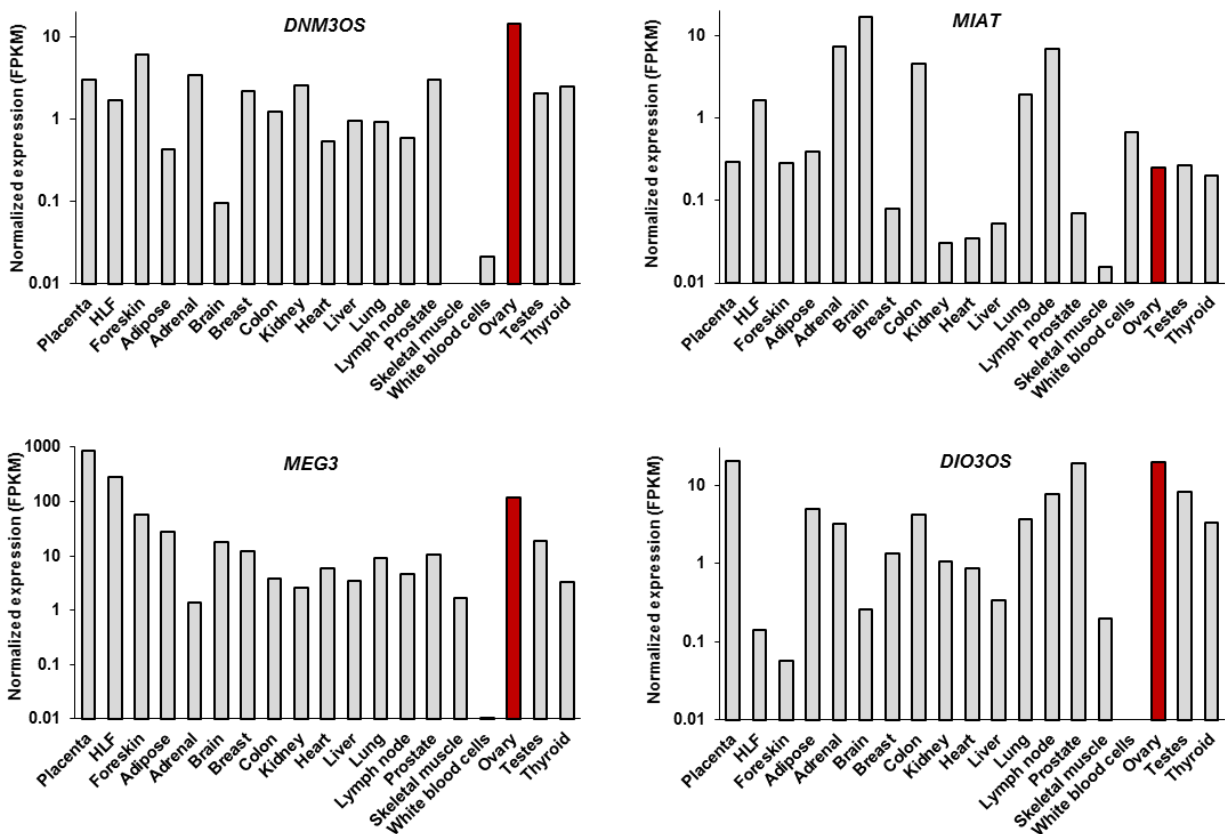

**Supplementary Figure 3. Analysis of conservation and expression of selected lncRNA.** A) Distribution of maximal conservation levels of lncRNA within 200 bp window. Blue bars denote those lncRNA that were strongly conserved across the primate species and potentially active in ovarian cancer EMT. B) Distribution of four lncRNA expression in 19 human normal tissues, including ovary.

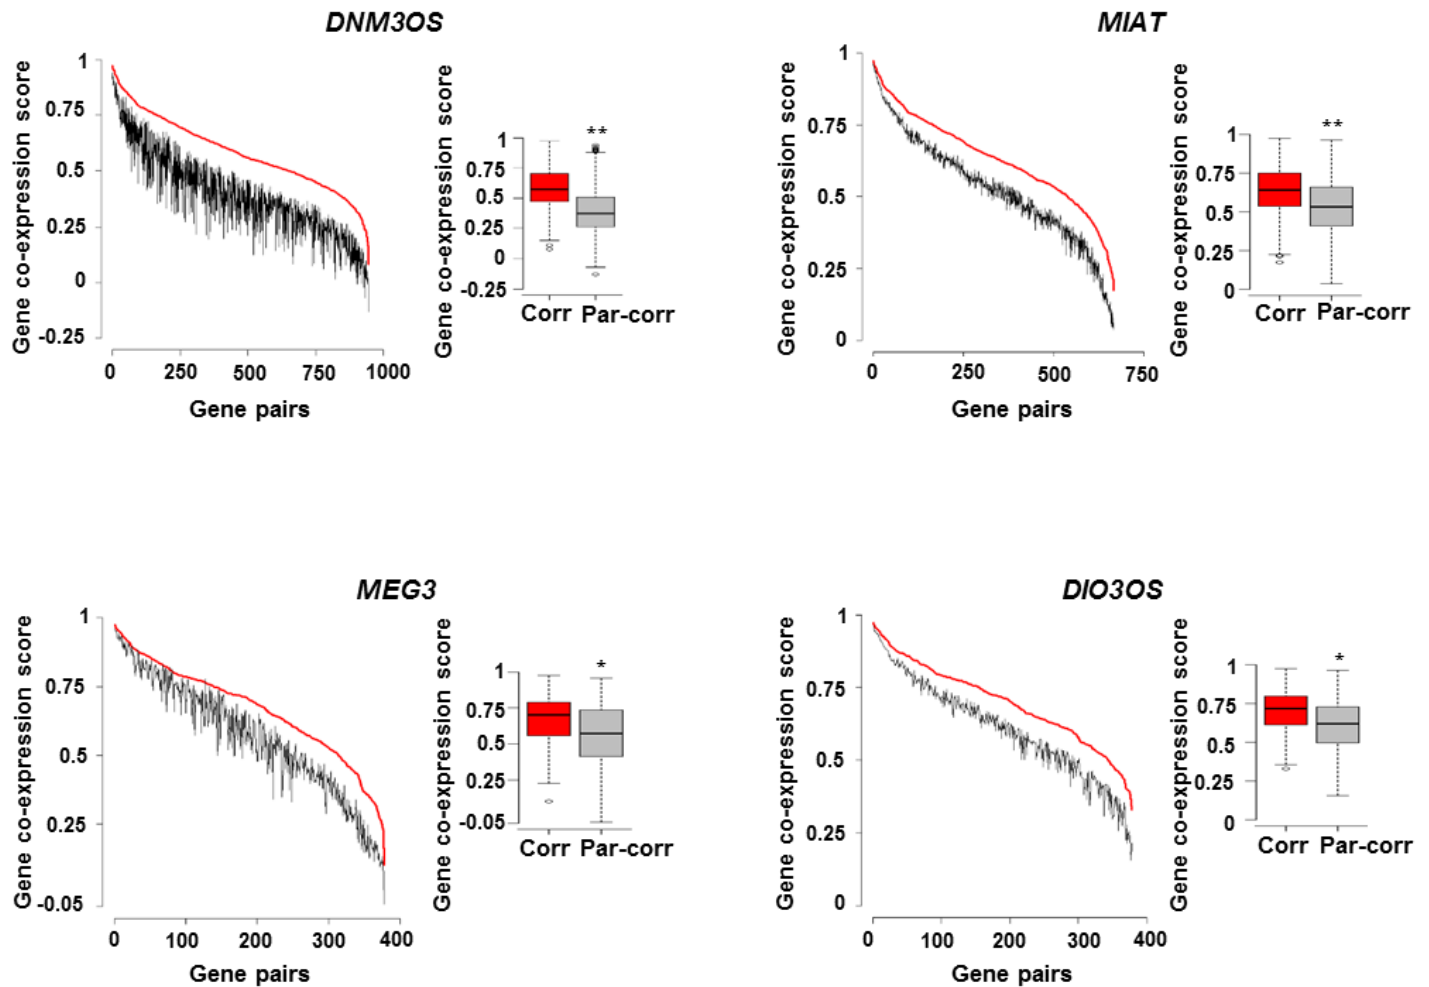

**Supplementary Figure 4. LncRNA-dependent gene co-expression.** Reduction of co-expression of EMT-linked genes after removing the effect of the indicated lncRNA using first-order partial correlation statistic. The analyses show comparative results of correlation and first-order partial correlation (Par-corr). Box and whisker plot summarizes the reduction of co-expression of EMT-linked genes after removing the effect of the lncRNA compared with the correlation value. Box represents the 25<sup>th</sup> and 75<sup>th</sup> percentiles, line indicates the median, and whiskers represent the maximum and minimum; \*\* $P < 2.2 \times 10^{-16}$ ; \* $P < 2.1 \times 10^{-11}$ , Wilcoxon rank-sum test.

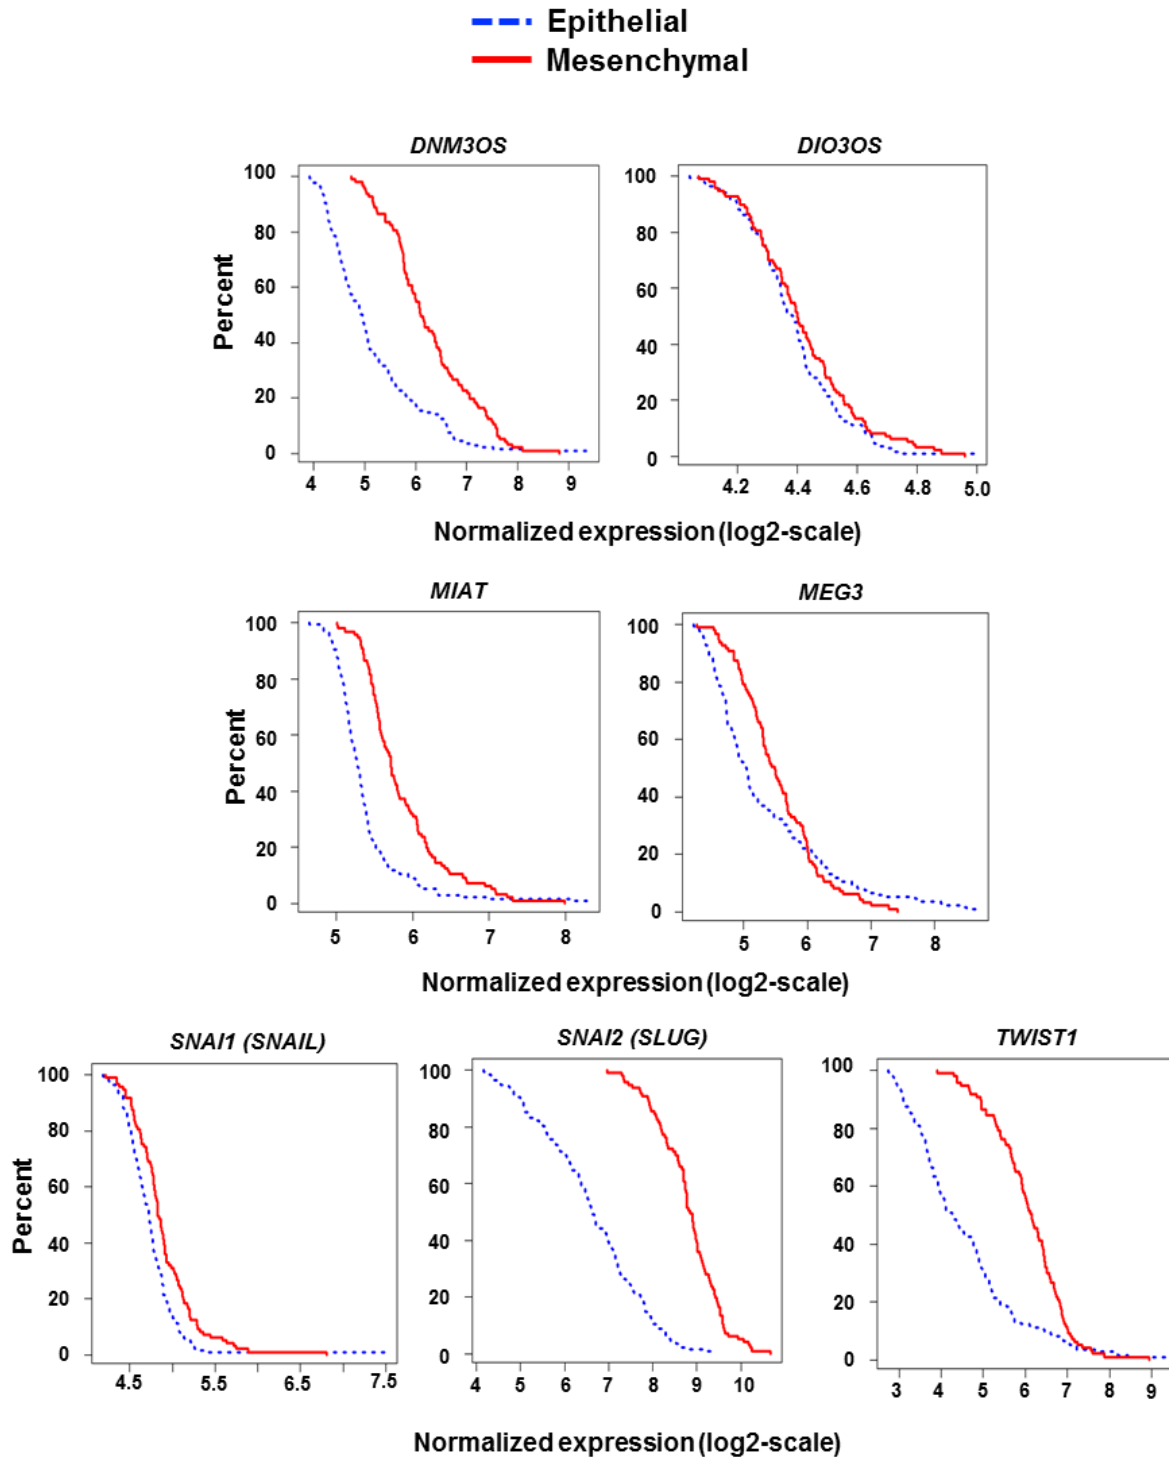

**Supplementary Figure 5. Empirical cumulative distribution of lncRNA expression in epithelial and mesenchymal subtypes in GSE9891 patient cohort.** Distribution of expression of four lncRNA and three EMT-linked mRNA in epithelial and mesenchymal ovarian cancer subtypes. X-axis represents normalized expression of indicated lncRNA or mRNA. Y-axis estimates percentage of patient sample at or below a given value of lncRNA or mRNA expression.

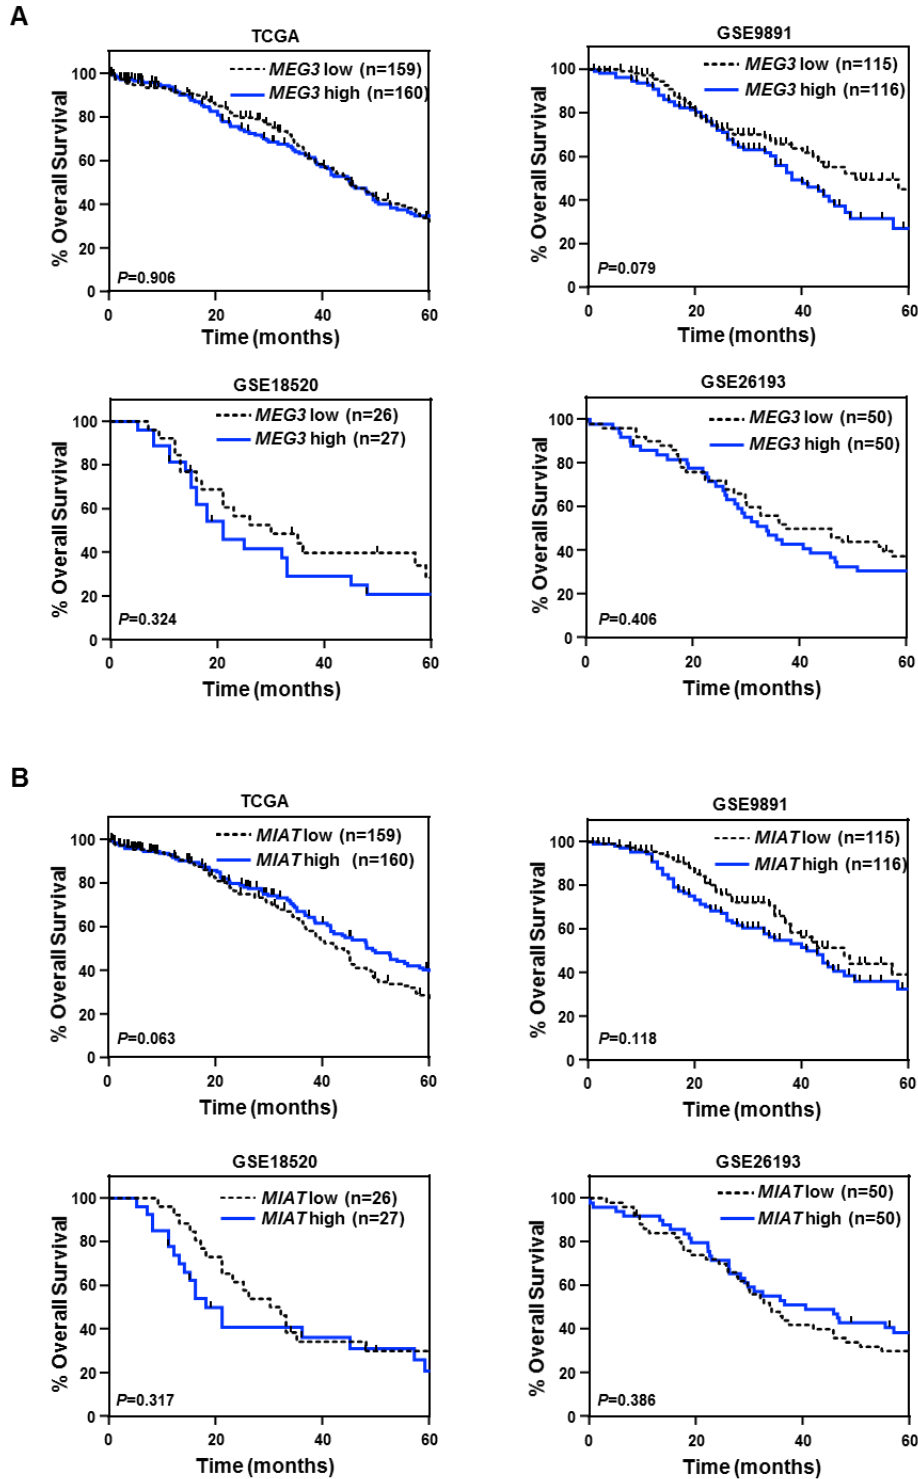

**Supplementary Figure 6. No correlation of *MEG3* or *MIAT* expression and overall survival of ovarian cancer patients.** Ovarian cancer patient samples were separated into A) *MEG3* low and *MEG3* high or B) *MIAT* low and *MIAT* high based on the median expression in four independent patient cohorts and Kaplan-Meier survival analyses were performed. *P*-values determined by log-rank test.

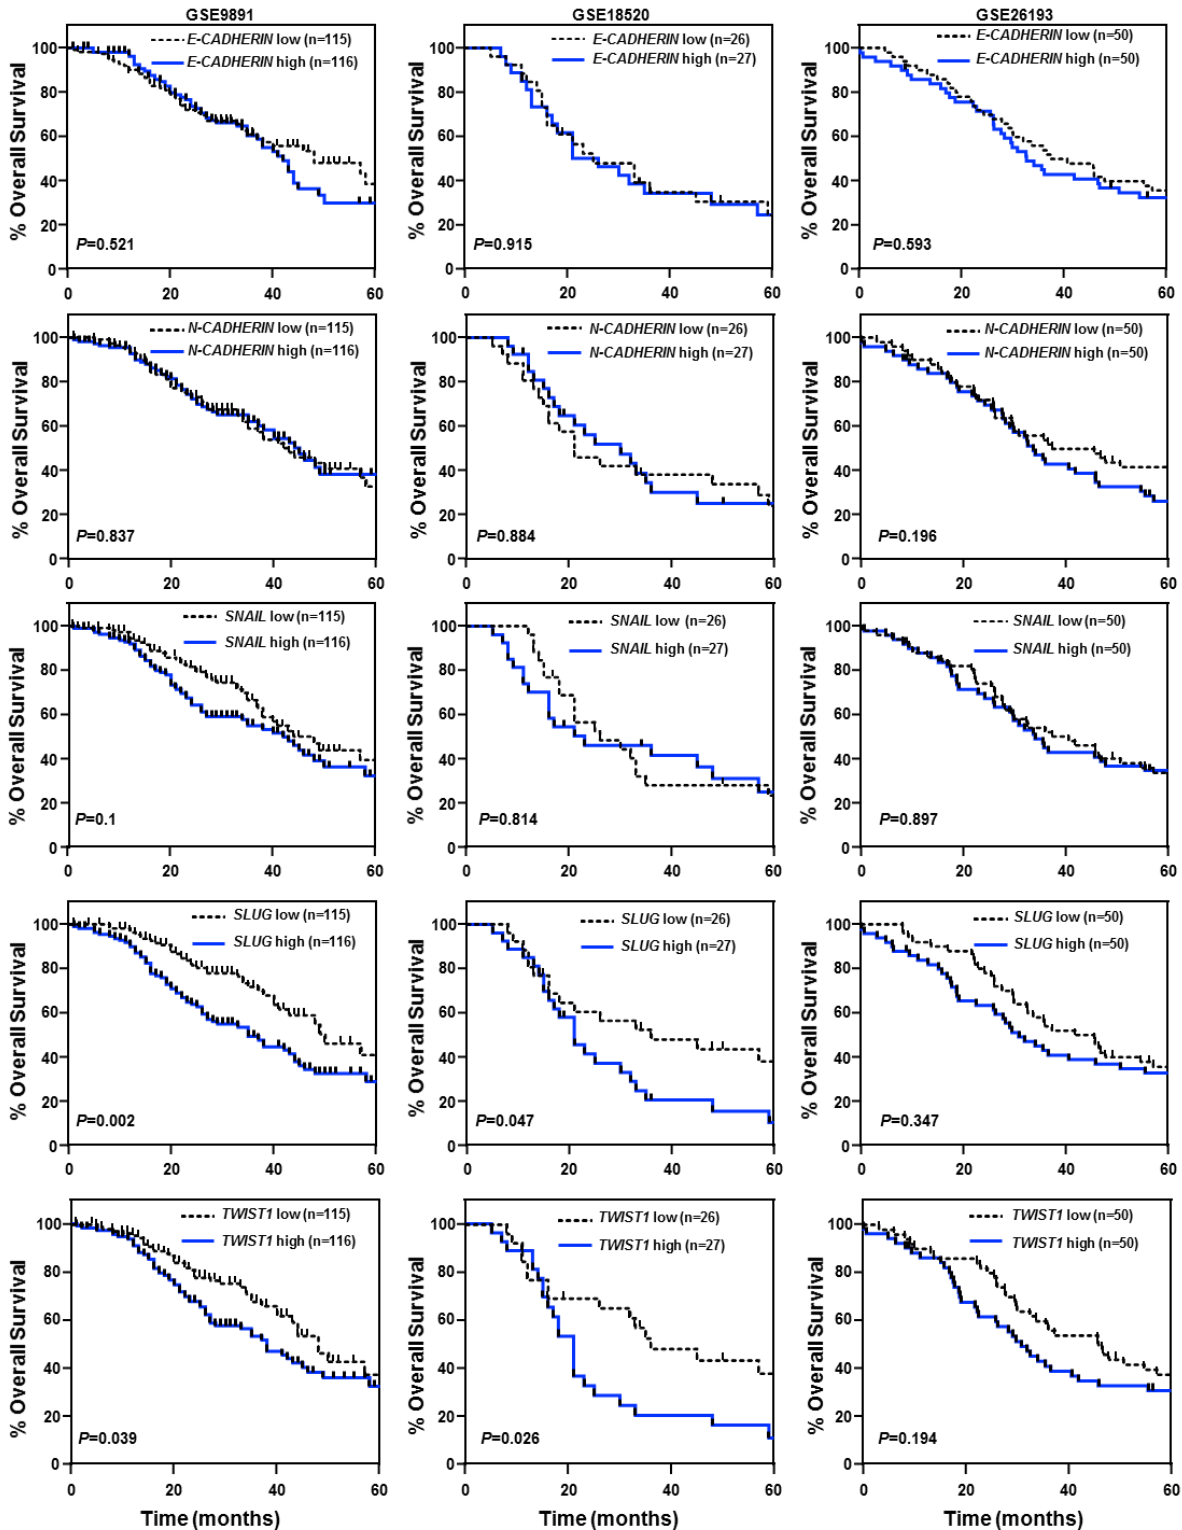

**Supplementary Figure 7. Ovarian cancer patient overall survival and correlations with EMT genes.** Ovarian cancer patient samples were separated into low and high levels of the indicated mRNA based on median expression in three independent patient cohorts and Kaplan-Meier survival analyses were performed. *P*-values determined by log-rank test.

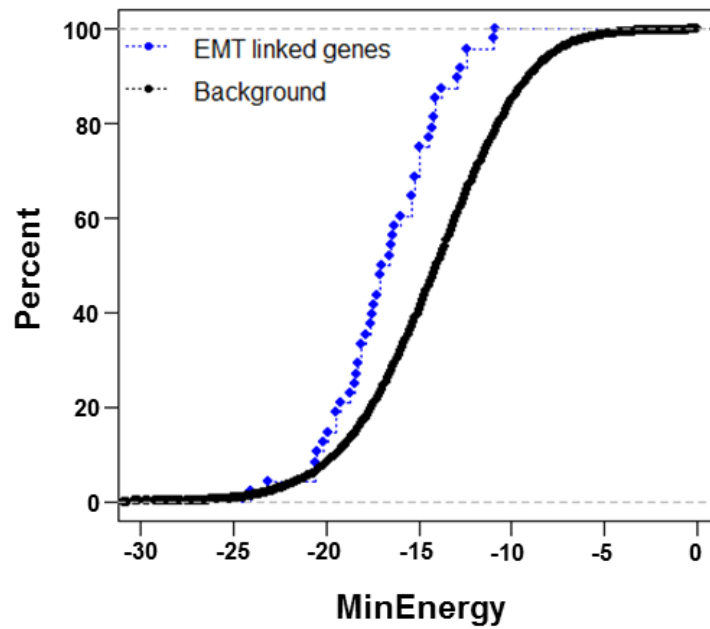

**Supplementary Figure 8. Predicted binding affinity between *DNM3OS* and EMT linked genes.** Empirical cumulative distribution of predicted interaction energy scores (MinEnergy) for *DNM3OS* with 48 EMT linked genes (blue dots) or background (genome-wide) gene set. X-axis represents minimum interaction energy (MinEnergy). Y-axis estimates percentage of genes for each group at or below a given MinEnergy score.



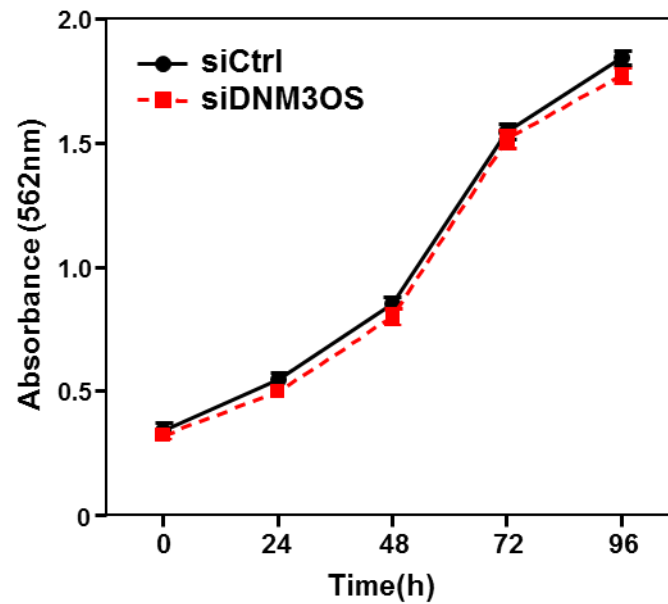

**Supplementary Figure 9. *DNM3OS* does not influence ovarian cancer proliferation.** MTT assays were performed at intervals starting 24 hrs after transfection of SKOV3 cells with SMARTpool siRNA or non-targeting control (triplicates);  $\pm$ SEM. Data are representative of at least three independent experiments.

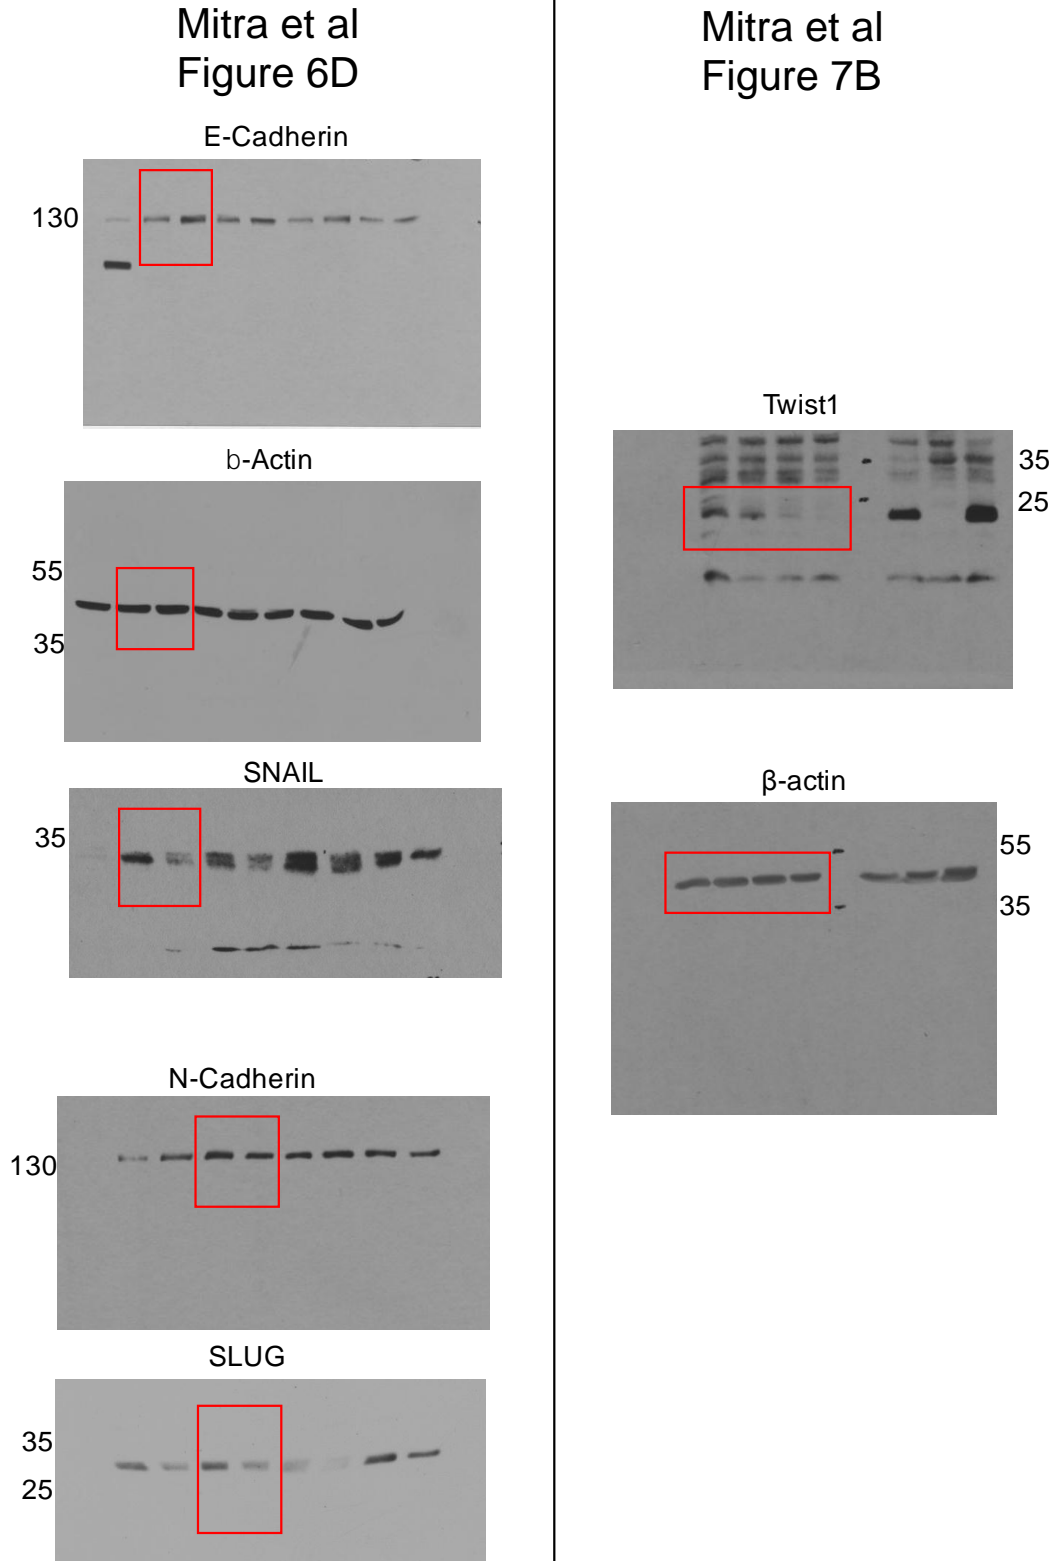

**Supplementary Figure 10. Uncropped scans of the Western blots in the manuscript.**  
Uncropped scans of the Western blots in Fig 6D and Fig 7B.

**Supplementary Table 1. Use of TCGA high-grade serous ovarian cancer data**

| <b>Data</b>                               | <b>Used for</b>                                                              |
|-------------------------------------------|------------------------------------------------------------------------------|
| lncRNA expression (RPKM <sup>§</sup> )    | Multivariate regression<br>Differential expression<br>Expression correlation |
| mRNA expression (RPKM)                    | Multivariate regression<br>Expression correlation                            |
| mRNA expression (Read counts)             | Differential expression                                                      |
| Copy number (Normalized segmented values) | Multivariate regression                                                      |
| Methylation (Beta-values)                 | Multivariate regression                                                      |
| miRNA expression (RPM <sup>§</sup> )      | Expression correlation                                                       |
| miRNA expression (Read counts)            | Differential expression                                                      |
| Protein expression (iTRAQ <sup>±</sup> )  | Differential expression                                                      |

<sup>§</sup>RPKM – Reads per kilobase of transcript per million mapped reads; <sup>§</sup>RPM – Reads per million mapped reads; <sup>±</sup> isobaric tags for relative and absolute quantitation.

**Supplementary Table 2. Differential expression of known EMT-linked genes<sup>§</sup>**

| Count | Gene symbol     | Fold-change (log2) | P         | Adj. P*   |
|-------|-----------------|--------------------|-----------|-----------|
| 1     | <i>POSTN</i>    | 3.671              | 1.57e-69  | 2.65e-67  |
| 2     | <i>COL3A1</i>   | 3.297              | 6.19e-165 | 2.79e-161 |
| 3     | <i>COL5A2</i>   | 3.228              | 2.22e-187 | 3.00e-183 |
| 4     | <i>FN1</i>      | 3.218              | 9.61e-150 | 1.30e-146 |
| 5     | <i>SERPINE1</i> | 3.177              | 8.67e-112 | 5.10e-109 |
| 6     | <i>COL8A1</i>   | 3.166              | 2.01e-110 | 1.09e-107 |
| 7     | <i>VCAN</i>     | 3.157              | 4.47e-143 | 5.49e-140 |
| 8     | <i>MMP2</i>     | 2.754              | 7.98e-150 | 1.20e-146 |
| 9     | <i>LOX</i>      | 2.712              | 5.73e-108 | 2.77e-105 |
| 10    | <i>COL1A2</i>   | 2.663              | 3.99e-130 | 3.37e-127 |
| 11    | <i>SNAI2</i>    | 2.391              | 4.24e-101 | 1.68e-98  |
| 12    | <i>SPARC</i>    | 2.383              | 6.16e-160 | 2.08e-156 |
| 13    | <i>CXCL12</i>   | 2.342              | 7.51e-61  | 9.77e-59  |
| 14    | <i>PDGFRB</i>   | 2.004              | 2.82e-97  | 1.03e-94  |
| 15    | <i>MMP14</i>    | 1.883              | 1.14e-85  | 3.02e-83  |
| 16    | <i>LOXL2</i>    | 1.881              | 7.85e-103 | 3.22e-100 |
| 17    | <i>PDPN</i>     | 1.876              | 1.12e-44  | 1.02e-42  |
| 18    | <i>ITGA5</i>    | 1.780              | 1.90e-96  | 6.75e-94  |
| 19    | <i>CTGF</i>     | 1.777              | 1.08e-41  | 9.04e-40  |
| 20    | <i>CYR61</i>    | 1.767              | 3.39e-45  | 3.16e-43  |
| 21    | <i>TNC</i>      | 1.705              | 1.02e-24  | 4.91e-23  |
| 22    | <i>TGFB111</i>  | 1.595              | 3.14e-72  | 5.74e-70  |
| 23    | <i>CDH13</i>    | 1.547              | 1.94e-21  | 8.20e-20  |
| 24    | <i>THBD</i>     | 1.547              | 2.54e-40  | 2.03e-38  |
| 25    | <i>ZEB1</i>     | 1.485              | 7.81e-57  | 9.27e-55  |
| 26    | <i>TGFB3</i>    | 1.469              | 1.20e-28  | 6.56e-27  |
| 27    | <i>ZEB2</i>     | 1.449              | 1.22e-51  | 1.29e-49  |
| 28    | <i>TWIST1</i>   | 1.440              | 3.28e-18  | 1.24e-16  |
| 29    | <i>BMP4</i>     | 1.411              | 1.77e-18  | 6.76e-17  |
| 30    | <i>CALD1</i>    | 1.359              | 4.28e-60  | 5.41e-58  |
| 31    | <i>IGFBP4</i>   | 1.314              | 1.18e-39  | 9.33e-38  |
| 32    | <i>SDC1</i>     | 1.280              | 4.17e-19  | 1.62e-17  |
| 33    | <i>RGS2</i>     | 1.269              | 4.06e-20  | 1.66e-18  |
| 34    | <i>SNAI1</i>    | 1.218              | 1.07e-23  | 4.98e-22  |
| 35    | <i>DDR2</i>     | 1.202              | 1.03e-16  | 3.46e-15  |
| 36    | <i>SEMA7A</i>   | 1.199              | 2.64e-34  | 1.81e-32  |
| 37    | <i>DAB2</i>     | 1.194              | 8.36e-41  | 6.77e-39  |
| 38    | <i>TFPI2</i>    | 1.173              | 3.11e-08  | 3.67e-07  |
| 39    | <i>COL8A2</i>   | 1.163              | 2.03e-16  | 6.66e-15  |
| 40    | <i>PTGS2</i>    | 1.056              | 1.10e-10  | 2.05e-09  |
| 41    | <i>MMP9</i>     | 1.032              | 2.65e-07  | 2.47e-06  |
| 42    | <i>PLAUR</i>    | 1.009              | 7.20e-24  | 3.41e-22  |
| 43    | <i>BMP1</i>     | 1.001              | 5.69e-32  | 3.56e-30  |
| 44    | <i>TP73</i>     | -1.052             | 2.41e-08  | 2.92e-07  |

<sup>§</sup>Literature supported EMT-linked genes were extracted from Chanrion et. al. [1] and Zhao et. al. [2];

\*P-values were adjusted using the Benjamini-Hochberg [3] multiple testing correction method.

### References for Supplementary Table 2.

1. Chanrion M et. al. Concomitant Notch activation and p53 deletion trigger epithelial-to-mesenchymal transition and metastasis in mouse gut. Nature communications. 2014; 5:5005.
2. Zhao M, Kong L, Liu Y and Qu H. dbEMT: an epithelial-mesenchymal transition associated gene resource. Scientific reports. 2015; 5:11459.
3. Benjamini Y and Hochberg Y. Controlling the False Discovery Rate - a Practical and Powerful Approach to Multiple Testing. J Roy Stat Soc B Met. 1995; 57(1):289-300.

**Supplementary Table 3. Linear expression association with survival time**

| <b>Data set</b> | <b>lncRNA</b> | <b>Spearman's <math>\rho</math></b> | <b>Correlation <math>P</math></b> |
|-----------------|---------------|-------------------------------------|-----------------------------------|
| GSE9891         | <i>DNM3OS</i> | -0.110                              | 0.048                             |
|                 | <i>MEG3</i>   | 0.0004                              | 0.502                             |
|                 | <i>MIAT</i>   | -0.040                              | 0.273                             |
| GSE18520        | <i>DNM3OS</i> | -0.252                              | 0.034                             |
|                 | <i>MEG3</i>   | -0.061                              | 0.332                             |
|                 | <i>MIAT</i>   | -0.241                              | 0.041                             |
| GSE26193        | <i>DNM3OS</i> | -0.281                              | 0.002                             |
|                 | <i>MEG3</i>   | -0.129                              | 0.101                             |
|                 | <i>MIAT</i>   | -0.074                              | 0.230                             |

**Supplementary Table 4. Differentially expressed genes in TCGA cohort that are significantly associated with *DNM3OS***

| Count | Gene symbol     | <i>P</i> -value | BH adjusted <i>P</i> -value |
|-------|-----------------|-----------------|-----------------------------|
| 1     | <i>ACTA2</i>    | 1.84E-26        | 1.76E-23                    |
| 2     | <i>ACTG2</i>    | 2.36E-27        | 2.60E-24                    |
| 3     | <i>ADAM12</i>   | 2.76E-31        | 5.24E-28                    |
| 4     | <i>ADAM19</i>   | 8.77E-21        | 3.62E-18                    |
| 5     | <i>ADAMTS10</i> | 4.60E-38        | 2.27E-34                    |
| 6     | <i>ADAMTS14</i> | 2.33E-18        | 6.56E-16                    |
| 7     | <i>ADAMTS2</i>  | 3.66E-32        | 7.77E-29                    |
| 8     | <i>ADAMTS4</i>  | 7.16E-21        | 3.00E-18                    |
| 9     | <i>ADAMTS5</i>  | 5.21E-17        | 1.15E-14                    |
| 10    | <i>ADAMTSL1</i> | 1.17E-20        | 4.75E-18                    |
| 11    | <i>ADAMTSL3</i> | 1.75E-13        | 1.92E-11                    |
| 12    | <i>ADRA2A</i>   | 5.60E-16        | 1.00E-13                    |
| 13    | <i>AEBP1</i>    | 2.47E-44        | 2.18E-40                    |
| 14    | <i>ALDH1A3</i>  | 2.87E-16        | 5.44E-14                    |
| 15    | <i>ANGPTL2</i>  | 6.52E-41        | 4.13E-37                    |
| 16    | <i>ANTXR1</i>   | 1.12E-44        | 1.02E-40                    |
| 17    | <i>AOC3</i>     | 2.86E-13        | 3.01E-11                    |
| 18    | <i>APLNR</i>    | 2.54E-22        | 1.34E-19                    |
| 19    | <i>APOD</i>     | 4.85E-21        | 2.10E-18                    |
| 20    | <i>ATP10A</i>   | 1.06E-11        | 7.89E-10                    |
| 21    | <i>BASP1</i>    | 2.69E-15        | 4.22E-13                    |
| 22    | <i>BMP4</i>     | 1.76E-15        | 2.86E-13                    |
| 23    | <i>C10orf55</i> | 1.68E-11        | 1.19E-09                    |
| 24    | <i>C13orf33</i> | 1.48E-17        | 3.60E-15                    |
| 25    | <i>C1QTNF1</i>  | 3.83E-41        | 2.52E-37                    |
| 26    | <i>C1QTNF3</i>  | 1.03E-18        | 3.06E-16                    |
| 27    | <i>C1QTNF6</i>  | 1.09E-26        | 1.08E-23                    |
| 28    | <i>C7orf10</i>  | 6.92E-10        | 3.30E-08                    |
| 29    | <i>CACNA1C</i>  | 4.24E-33        | 9.89E-30                    |
| 30    | <i>CALD1</i>    | 1.29E-33        | 3.23E-30                    |
| 31    | <i>CCDC80</i>   | 3.64E-22        | 1.87E-19                    |
| 32    | <i>CD163</i>    | 5.95E-12        | 4.68E-10                    |
| 33    | <i>CD209</i>    | 5.20E-12        | 4.14E-10                    |
| 34    | <i>CD248</i>    | 2.37E-24        | 1.65E-21                    |
| 35    | <i>CD36</i>     | 1.73E-12        | 1.53E-10                    |
| 36    | <i>CD93</i>     | 4.42E-25        | 3.42E-22                    |
| 37    | <i>CDH11</i>    | 1.04E-54        | 2.44E-50                    |
| 38    | <i>CERCAM</i>   | 4.19E-18        | 1.13E-15                    |
| 39    | <i>CHRD</i>     | 6.58E-44        | 5.54E-40                    |
| 40    | <i>CILP</i>     | 1.30E-16        | 2.63E-14                    |
| 41    | <i>CILP2</i>    | 7.99E-20        | 2.83E-17                    |
| 42    | <i>CLDN11</i>   | 4.63E-29        | 6.60E-26                    |

|    |                |          |          |
|----|----------------|----------|----------|
| 43 | <i>CNN1</i>    | 3.00E-23 | 1.78E-20 |
| 44 | <i>CNN2</i>    | 1.31E-21 | 6.18E-19 |
| 45 | <i>CNRIP1</i>  | 1.01E-71 | 9.07E-67 |
| 46 | <i>COL10A1</i> | 7.34E-25 | 5.52E-22 |
| 47 | <i>COL11A1</i> | 6.70E-24 | 4.40E-21 |
| 48 | <i>COL15A1</i> | 8.06E-32 | 1.63E-28 |
| 49 | <i>COL1A1</i>  | 3.63E-51 | 5.59E-47 |
| 50 | <i>COL1A2</i>  | 5.31E-55 | 1.43E-50 |
| 51 | <i>COL3A1</i>  | 7.35E-49 | 9.43E-45 |
| 52 | <i>COL4A1</i>  | 6.19E-22 | 3.09E-19 |
| 53 | <i>COL5A1</i>  | 4.39E-51 | 6.57E-47 |
| 54 | <i>COL5A2</i>  | 7.75E-44 | 6.43E-40 |
| 55 | <i>COL5A3</i>  | 5.68E-20 | 2.07E-17 |
| 56 | <i>COL6A1</i>  | 2.88E-45 | 2.82E-41 |
| 57 | <i>COL6A2</i>  | 2.08E-51 | 3.40E-47 |
| 58 | <i>COL6A3</i>  | 2.84E-61 | 1.39E-56 |
| 59 | <i>COL8A1</i>  | 2.10E-33 | 5.08E-30 |
| 60 | <i>COL8A2</i>  | 1.48E-13 | 1.65E-11 |
| 61 | <i>COLEC12</i> | 8.82E-35 | 2.58E-31 |
| 62 | <i>COMP</i>    | 1.13E-11 | 8.35E-10 |
| 63 | <i>CSDC2</i>   | 1.20E-12 | 1.10E-10 |
| 64 | <i>CSF2RB</i>  | 4.54E-12 | 3.66E-10 |
| 65 | <i>CTGF</i>    | 1.62E-23 | 1.00E-20 |
| 66 | <i>CTHRC1</i>  | 4.91E-26 | 4.44E-23 |
| 67 | <i>CTSK</i>    | 1.23E-28 | 1.64E-25 |
| 68 | <i>CXCL12</i>  | 3.70E-24 | 2.52E-21 |
| 69 | <i>CXCL14</i>  | 3.64E-17 | 8.27E-15 |
| 70 | <i>CYP1B1</i>  | 5.99E-11 | 3.73E-09 |
| 71 | <i>CYR61</i>   | 4.44E-22 | 2.26E-19 |
| 72 | <i>DAB2</i>    | 1.99E-30 | 3.45E-27 |
| 73 | <i>DACT1</i>   | 3.18E-46 | 3.43E-42 |
| 74 | <i>DACT3</i>   | 2.30E-40 | 1.41E-36 |
| 75 | <i>DCHS1</i>   | 9.79E-35 | 2.85E-31 |
| 76 | <i>DCLK1</i>   | 1.13E-14 | 1.57E-12 |
| 77 | <i>DCN</i>     | 1.79E-52 | 3.45E-48 |
| 78 | <i>DDR2</i>    | 9.42E-23 | 5.23E-20 |
| 79 | <i>DES</i>     | 1.21E-11 | 8.89E-10 |
| 80 | <i>DKK2</i>    | 2.97E-28 | 3.78E-25 |
| 81 | <i>DPYSL3</i>  | 1.16E-16 | 2.37E-14 |
| 82 | <i>ECM1</i>    | 1.13E-28 | 1.52E-25 |
| 83 | <i>EFEMP1</i>  | 3.59E-11 | 2.36E-09 |
| 84 | <i>EGR2</i>    | 6.08E-12 | 4.77E-10 |
| 85 | <i>EHD2</i>    | 2.12E-18 | 5.98E-16 |
| 86 | <i>ELN</i>     | 2.54E-16 | 4.87E-14 |
| 87 | <i>EMILIN1</i> | 3.45E-59 | 1.33E-54 |

|     |                |          |          |
|-----|----------------|----------|----------|
| 88  | <i>ENPP1</i>   | 3.13E-13 | 3.26E-11 |
| 89  | <i>ETV1</i>    | 3.03E-34 | 8.25E-31 |
| 90  | <i>F13A1</i>   | 5.62E-28 | 6.87E-25 |
| 91  | <i>F2R</i>     | 9.76E-25 | 7.17E-22 |
| 92  | <i>FAM101A</i> | 8.06E-19 | 2.44E-16 |
| 93  | <i>FAM198B</i> | 6.46E-55 | 1.66E-50 |
| 94  | <i>FAP</i>     | 1.31E-27 | 1.52E-24 |
| 95  | <i>FBLN2</i>   | 9.14E-12 | 6.89E-10 |
| 96  | <i>FBN1</i>    | 4.19E-58 | 1.33E-53 |
| 97  | <i>FEZ1</i>    | 3.37E-27 | 3.64E-24 |
| 98  | <i>FIBIN</i>   | 2.23E-29 | 3.33E-26 |
| 99  | <i>FILIP1L</i> | 2.02E-51 | 3.40E-47 |
| 100 | <i>FKBP14</i>  | 2.36E-32 | 5.09E-29 |
| 101 | <i>FLNC</i>    | 3.53E-13 | 3.63E-11 |
| 102 | <i>FLRT2</i>   | 6.97E-32 | 1.42E-28 |
| 103 | <i>FN1</i>     | 4.26E-27 | 4.48E-24 |
| 104 | <i>FOLR2</i>   | 3.78E-13 | 3.86E-11 |
| 105 | <i>FPR1</i>    | 1.23E-11 | 9.01E-10 |
| 106 | <i>FRMD6</i>   | 3.91E-39 | 2.13E-35 |
| 107 | <i>FSTL1</i>   | 1.33E-34 | 3.83E-31 |
| 108 | <i>FSTL3</i>   | 8.34E-20 | 2.94E-17 |
| 109 | <i>FZD1</i>    | 4.20E-29 | 6.07E-26 |
| 110 | <i>GAS1</i>    | 8.20E-10 | 3.84E-08 |
| 111 | <i>GAS7</i>    | 7.19E-24 | 4.70E-21 |
| 112 | <i>GEM</i>     | 2.11E-19 | 7.00E-17 |
| 113 | <i>GFPT2</i>   | 9.56E-25 | 7.04E-22 |
| 114 | <i>GHR</i>     | 3.29E-12 | 2.74E-10 |
| 115 | <i>GJB2</i>    | 1.56E-14 | 2.12E-12 |
| 116 | <i>GLI3</i>    | 6.69E-22 | 3.32E-19 |
| 117 | <i>GLT8D2</i>  | 4.78E-48 | 5.73E-44 |
| 118 | <i>GPR124</i>  | 7.54E-52 | 1.35E-47 |
| 119 | <i>GUCY1A3</i> | 1.23E-14 | 1.70E-12 |
| 120 | <i>HIC1</i>    | 1.55E-56 | 4.64E-52 |
| 121 | <i>HOPX</i>    | 9.15E-22 | 4.44E-19 |
| 122 | <i>HTRA1</i>   | 1.98E-34 | 5.56E-31 |
| 123 | <i>HTRA3</i>   | 3.00E-33 | 7.16E-30 |
| 124 | <i>ID3</i>     | 3.53E-17 | 8.04E-15 |
| 125 | <i>IGFBP4</i>  | 8.97E-41 | 5.62E-37 |
| 126 | <i>IL16</i>    | 1.79E-14 | 2.40E-12 |
| 127 | <i>INHBA</i>   | 1.53E-26 | 1.48E-23 |
| 128 | <i>ISLR</i>    | 6.39E-41 | 4.10E-37 |
| 129 | <i>ITGA11</i>  | 2.48E-43 | 2.00E-39 |
| 130 | <i>ITGA5</i>   | 1.70E-31 | 3.31E-28 |
| 131 | <i>JAM3</i>    | 4.22E-34 | 1.12E-30 |
| 132 | <i>JPH2</i>    | 3.93E-15 | 5.97E-13 |



|     |                |          |          |
|-----|----------------|----------|----------|
| 133 | <i>KCNE4</i>   | 1.58E-42 | 1.22E-38 |
| 134 | <i>KCNMB1</i>  | 1.64E-14 | 2.22E-12 |
| 135 | <i>KIFC3</i>   | 1.16E-21 | 5.52E-19 |
| 136 | <i>KLF2</i>    | 1.86E-19 | 6.22E-17 |
| 137 | <i>LAMA4</i>   | 6.94E-31 | 1.26E-27 |
| 138 | <i>LAMB1</i>   | 8.54E-28 | 1.02E-24 |
| 139 | <i>LDB2</i>    | 3.85E-30 | 6.43E-27 |
| 140 | <i>LHFP</i>    | 9.73E-59 | 3.28E-54 |
| 141 | <i>LMOD1</i>   | 8.86E-36 | 3.14E-32 |
| 142 | <i>LOX</i>     | 4.77E-29 | 6.78E-26 |
| 143 | <i>LOXL1</i>   | 2.75E-27 | 2.99E-24 |
| 144 | <i>LOXL2</i>   | 3.04E-37 | 1.33E-33 |
| 145 | <i>LRP1</i>    | 1.66E-21 | 7.70E-19 |
| 146 | <i>LRRC17</i>  | 1.70E-20 | 6.73E-18 |
| 147 | <i>LRRN4CL</i> | 3.04E-40 | 1.84E-36 |
| 148 | <i>LTBP2</i>   | 4.08E-21 | 1.79E-18 |
| 149 | <i>LUM</i>     | 1.25E-33 | 3.15E-30 |
| 150 | <i>LYVE1</i>   | 2.18E-11 | 1.51E-09 |
| 151 | <i>LZTS1</i>   | 1.85E-25 | 1.53E-22 |
| 152 | <i>MATN3</i>   | 4.22E-26 | 3.87E-23 |
| 153 | <i>MDF1</i>    | 9.47E-20 | 3.32E-17 |
| 154 | <i>MEIS3</i>   | 3.12E-39 | 1.73E-35 |
| 155 | <i>MFAP5</i>   | 7.41E-11 | 4.52E-09 |
| 156 | <i>MME</i>     | 1.56E-19 | 5.28E-17 |
| 157 | <i>MMP11</i>   | 9.55E-26 | 8.26E-23 |
| 158 | <i>MMP14</i>   | 3.04E-31 | 5.75E-28 |
| 159 | <i>MMP2</i>    | 4.89E-40 | 2.83E-36 |
| 160 | <i>MNI</i>     | 3.73E-23 | 2.18E-20 |
| 161 | <i>MOXD1</i>   | 5.00E-17 | 1.11E-14 |
| 162 | <i>MRC2</i>    | 8.50E-24 | 5.53E-21 |
| 163 | <i>MRGPRF</i>  | 3.20E-48 | 3.92E-44 |
| 164 | <i>MRVII</i>   | 1.73E-55 | 4.91E-51 |
| 165 | <i>MSC</i>     | 1.03E-28 | 1.38E-25 |
| 166 | <i>MSRB3</i>   | 2.19E-41 | 1.46E-37 |
| 167 | <i>MYH11</i>   | 2.63E-17 | 6.14E-15 |
| 168 | <i>NAV3</i>    | 2.02E-37 | 9.23E-34 |
| 169 | <i>NBL1</i>    | 4.01E-22 | 2.05E-19 |
| 170 | <i>NEDD4</i>   | 1.93E-17 | 4.59E-15 |
| 171 | <i>NID2</i>    | 3.26E-34 | 8.83E-31 |
| 172 | <i>NKD2</i>    | 1.64E-27 | 1.86E-24 |
| 173 | <i>NT5E</i>    | 1.08E-22 | 5.98E-20 |
| 174 | <i>NUAK1</i>   | 3.06E-31 | 5.77E-28 |
| 175 | <i>OLFML1</i>  | 1.61E-51 | 2.80E-47 |
| 176 | <i>OLFML2B</i> | 1.88E-27 | 2.10E-24 |
| 177 | <i>OLFML3</i>  | 2.58E-23 | 1.54E-20 |

|     |                 |          |          |
|-----|-----------------|----------|----------|
| 178 | <i>PALLD</i>    | 1.52E-30 | 2.69E-27 |
| 179 | <i>PAPSS2</i>   | 7.83E-29 | 1.08E-25 |
| 180 | <i>PCOLCE</i>   | 7.30E-36 | 2.66E-32 |
| 181 | <i>PDGFD</i>    | 4.27E-14 | 5.33E-12 |
| 182 | <i>PDGFRA</i>   | 4.80E-60 | 1.99E-55 |
| 183 | <i>PDGFRB</i>   | 5.36E-49 | 7.05E-45 |
| 184 | <i>PDLIM3</i>   | 8.01E-35 | 2.41E-31 |
| 185 | <i>PDPN</i>     | 3.15E-30 | 5.32E-27 |
| 186 | <i>PHLDB2</i>   | 2.05E-14 | 2.72E-12 |
| 187 | <i>PLAU</i>     | 3.28E-17 | 7.52E-15 |
| 188 | <i>PLK2</i>     | 1.17E-16 | 2.39E-14 |
| 189 | <i>PLXDC1</i>   | 2.84E-36 | 1.13E-32 |
| 190 | <i>PMEPA1</i>   | 2.71E-17 | 6.31E-15 |
| 191 | <i>PMP22</i>    | 2.31E-27 | 2.56E-24 |
| 192 | <i>PODN</i>     | 8.58E-34 | 2.19E-30 |
| 193 | <i>PODNL1</i>   | 9.06E-13 | 8.54E-11 |
| 194 | <i>POSTN</i>    | 2.03E-17 | 4.80E-15 |
| 195 | <i>PRDM1</i>    | 3.73E-24 | 2.53E-21 |
| 196 | <i>PRRX1</i>    | 6.86E-35 | 2.15E-31 |
| 197 | <i>PTGER3</i>   | 5.91E-14 | 7.17E-12 |
| 198 | <i>PTGIS</i>    | 6.92E-36 | 2.54E-32 |
| 199 | <i>PTRF</i>     | 2.17E-19 | 7.19E-17 |
| 200 | <i>PXDN</i>     | 2.24E-15 | 3.58E-13 |
| 201 | <i>RAB31</i>    | 4.45E-29 | 6.40E-26 |
| 202 | <i>RASGRF2</i>  | 3.95E-50 | 5.75E-46 |
| 203 | <i>RCAN2</i>    | 5.20E-25 | 3.99E-22 |
| 204 | <i>RCN3</i>     | 1.33E-27 | 1.54E-24 |
| 205 | <i>RGS16</i>    | 2.77E-16 | 5.27E-14 |
| 206 | <i>RGS2</i>     | 3.46E-11 | 2.28E-09 |
| 207 | <i>RGS4</i>     | 1.06E-42 | 8.28E-39 |
| 208 | <i>RUNX2</i>    | 2.35E-24 | 1.64E-21 |
| 209 | <i>SCARF2</i>   | 2.44E-29 | 3.62E-26 |
| 210 | <i>SCUBE2</i>   | 1.06E-13 | 1.22E-11 |
| 211 | <i>SDC1</i>     | 1.90E-13 | 2.07E-11 |
| 212 | <i>SEMA3C</i>   | 2.80E-21 | 1.27E-18 |
| 213 | <i>SEMA7A</i>   | 1.89E-32 | 4.09E-29 |
| 214 | <i>SERPINE1</i> | 9.95E-27 | 9.95E-24 |
| 215 | <i>SERPINF1</i> | 7.62E-37 | 3.26E-33 |
| 216 | <i>SFRP1</i>    | 3.90E-12 | 3.19E-10 |
| 217 | <i>SFRP2</i>    | 1.62E-15 | 2.65E-13 |
| 218 | <i>SFRP4</i>    | 1.00E-49 | 1.42E-45 |
| 219 | <i>SLC2A3</i>   | 2.99E-13 | 3.13E-11 |
| 220 | <i>SLIT2</i>    | 1.36E-11 | 9.85E-10 |
| 221 | <i>SMOC2</i>    | 1.82E-34 | 5.14E-31 |
| 222 | <i>SNAI2</i>    | 8.72E-59 | 3.13E-54 |

|     |                 |          |          |
|-----|-----------------|----------|----------|
| 223 | <i>SPARC</i>    | 1.07E-44 | 9.94E-41 |
| 224 | <i>SPHK1</i>    | 5.67E-17 | 1.24E-14 |
| 225 | <i>SPOCK1</i>   | 1.63E-11 | 1.16E-09 |
| 226 | <i>SPON2</i>    | 6.13E-27 | 6.29E-24 |
| 227 | <i>ST6GAL2</i>  | 7.20E-10 | 3.42E-08 |
| 228 | <i>SULF1</i>    | 8.67E-11 | 5.19E-09 |
| 229 | <i>SULF2</i>    | 5.92E-36 | 2.20E-32 |
| 230 | <i>SYNE1</i>    | 1.46E-22 | 7.93E-20 |
| 231 | <i>TAGLN</i>    | 1.31E-25 | 1.11E-22 |
| 232 | <i>TDO2</i>     | 8.80E-13 | 8.33E-11 |
| 233 | <i>TGFB111</i>  | 5.25E-25 | 4.03E-22 |
| 234 | <i>TGFB3</i>    | 9.68E-26 | 8.36E-23 |
| 235 | <i>TGFB1</i>    | 6.45E-29 | 9.01E-26 |
| 236 | <i>THBD</i>     | 1.74E-16 | 3.45E-14 |
| 237 | <i>THBS1</i>    | 1.03E-37 | 4.91E-34 |
| 238 | <i>THBS2</i>    | 1.85E-36 | 7.50E-33 |
| 239 | <i>TIMP2</i>    | 1.01E-32 | 2.25E-29 |
| 240 | <i>TIMP3</i>    | 1.39E-20 | 5.57E-18 |
| 241 | <i>TMEM119</i>  | 3.51E-19 | 1.13E-16 |
| 242 | <i>TMEM158</i>  | 3.39E-12 | 2.81E-10 |
| 243 | <i>TMEM200A</i> | 2.52E-42 | 1.89E-38 |
| 244 | <i>TNC</i>      | 2.81E-14 | 3.63E-12 |
| 245 | <i>TNFAIP6</i>  | 8.83E-14 | 1.03E-11 |
| 246 | <i>TNFSF4</i>   | 1.34E-19 | 4.57E-17 |
| 247 | <i>TSHZ3</i>    | 3.79E-29 | 5.51E-26 |
| 248 | <i>TSPAN18</i>  | 5.35E-18 | 1.40E-15 |
| 249 | <i>TWIST1</i>   | 9.01E-23 | 5.03E-20 |
| 250 | <i>VCAM1</i>    | 1.21E-25 | 1.03E-22 |
| 251 | <i>VCAN</i>     | 2.34E-38 | 1.18E-34 |
| 252 | <i>WISP1</i>    | 1.10E-46 | 1.24E-42 |
| 253 | <i>XYLT1</i>    | 9.19E-18 | 2.31E-15 |
| 254 | <i>ZCCHC24</i>  | 1.06E-35 | 3.66E-32 |
| 255 | <i>ZEB1</i>     | 8.88E-62 | 5.32E-57 |
| 256 | <i>ZEB2</i>     | 1.72E-31 | 3.34E-28 |

---

**Supplementary Table 5. Protein-protein interactions  
between *DNM3OS*-associated protein coding genes**

| <b>Count</b> | <b>Interactor A</b> | <b>Interactor B</b> |
|--------------|---------------------|---------------------|
| 1            | ACTA2               | CNN2                |
| 2            | ADAM12              | FSTL3               |
| 3            | ADAMTS4             | FN1                 |
| 4            | BMP4                | FSTL1               |
| 5            | BMP4                | HTRA1               |
| 6            | CD36                | CHRD                |
| 7            | COL1A1              | CD36                |
| 8            | COL1A1              | CD93                |
| 9            | COL1A1              | COL1A2              |
| 10           | COL1A1              | CTHRC1              |
| 11           | COL1A1              | DCN                 |
| 12           | COL1A1              | DDR2                |
| 13           | COL1A1              | FN1                 |
| 14           | COL1A1              | HTRA1               |
| 15           | COL1A1              | ITGA5               |
| 16           | COL1A1              | LOX                 |
| 17           | COL1A1              | MMP2                |
| 18           | COL1A1              | NID2                |
| 19           | COL1A1              | SPARC               |
| 20           | COL1A1              | TGFBI               |
| 21           | COL1A1              | THBS1               |
| 22           | COL1A2              | CD36                |
| 23           | COL1A2              | CD93                |
| 24           | COL1A2              | COL5A3              |
| 25           | COL1A2              | LOX                 |
| 26           | COL1A2              | LUM                 |
| 27           | COL1A2              | SPARC               |
| 28           | COL1A2              | TGFBI               |
| 29           | COL3A1              | DDR2                |
| 30           | COL3A1              | HTRA1               |
| 31           | COL3A1              | LOX                 |
| 32           | COL3A1              | PCOLCE              |
| 33           | COL3A1              | SPARC               |
| 34           | COL3A1              | THBS1               |
| 35           | COL4A1              | CD93                |
| 36           | COL4A1              | DCN                 |
| 37           | COL4A1              | FBLN2               |
| 38           | COL4A1              | FN1                 |
| 39           | COL4A1              | NID2                |
| 40           | COL4A1              | TGFBI               |

|    |        |        |
|----|--------|--------|
| 41 | COL4A1 | THBS1  |
| 42 | COL5A1 | COL5A3 |
| 43 | COL8A2 | COL8A1 |
| 44 | CTGF   | LRP1   |
| 45 | DAB2   | LRP1   |
| 46 | DCN    | COL1A2 |
| 47 | DCN    | COL5A1 |
| 48 | DCN    | COL6A1 |
| 49 | DCN    | ELN    |
| 50 | DCN    | FBN1   |
| 51 | DCN    | MMP2   |
| 52 | DCN    | THBS1  |
| 53 | ELN    | FBLN2  |
| 54 | ELN    | FBN1   |
| 55 | ELN    | LOX    |
| 56 | ELN    | LOXL1  |
| 57 | ELN    | NID2   |
| 58 | F13A1  | FN1    |
| 59 | F2R    | CHRD   |
| 60 | FBN1   | FBLN2  |
| 61 | FBN1   | MFAP5  |
| 62 | FEZ1   | OLFML3 |
| 63 | FLNC   | PHLDB2 |
| 64 | FN1    | CNN2   |
| 65 | FN1    | COL1A2 |
| 66 | FN1    | COL6A2 |
| 67 | FN1    | COMP   |
| 68 | FN1    | CTGF   |
| 69 | FN1    | CXCL12 |
| 70 | FN1    | DAB2   |
| 71 | FN1    | DCN    |
| 72 | FN1    | FBLN2  |
| 73 | FN1    | FLNC   |
| 74 | FN1    | ITGA5  |
| 75 | FN1    | LOX    |
| 76 | FN1    | NT5E   |
| 77 | FN1    | SPARC  |
| 78 | FN1    | TGFBI  |
| 79 | FN1    | THBS1  |
| 80 | FN1    | TNC    |
| 81 | FSTL1  | INHBA  |
| 82 | FSTL3  | FN1    |
| 83 | FSTL3  | INHBA  |

|     |          |          |
|-----|----------|----------|
| 84  | GLI3     | TWIST1   |
| 85  | ITGA5    | CTGF     |
| 86  | ITGA5    | TNC      |
| 87  | LAMB1    | COL6A1   |
| 88  | LOX      | FBN1     |
| 89  | MATN3    | COMP     |
| 90  | MME      | MRVI1    |
| 91  | MMP14    | LRP1     |
| 92  | MMP14    | LUM      |
| 93  | MMP14    | SPOCK1   |
| 94  | MMP2     | COL6A3   |
| 95  | MMP2     | CXCL12   |
| 96  | MMP2     | MMP14    |
| 97  | MMP2     | SPOCK1   |
| 98  | MMP2     | THBS2    |
| 99  | MMP2     | TIMP2    |
| 100 | MMP2     | TIMP3    |
| 101 | MYH11    | ACTA2    |
| 102 | NEDD4    | KIFC3    |
| 103 | NEDD4    | PLK2     |
| 104 | NEDD4    | PMEPA1   |
| 105 | NEDD4    | SULF1    |
| 106 | PCOLCE   | ANTXR1   |
| 107 | PDGFRB   | NEDD4    |
| 108 | PDGFRB   | PDGFD    |
| 109 | PDGFRB   | PDGFRA   |
| 110 | PDLIM3   | PALLD    |
| 111 | PLAU     | SERPINE1 |
| 112 | SDC1     | MMP14    |
| 113 | SERPINE1 | LRP1     |
| 114 | SPARC    | COL5A1   |
| 115 | SPARC    | CTSK     |
| 116 | TGFB3    | CTGF     |
| 117 | THBS1    | CD36     |
| 118 | THBS1    | COL5A1   |
| 119 | THBS1    | LRP1     |
| 120 | THBS1    | MMP2     |
| 121 | THBS1    | PCOLCE   |
| 122 | THBS1    | SPARC    |
| 123 | THBS1    | TNFAIP6  |
| 124 | TIMP2    | MMP14    |
| 125 | TIMP3    | ADAMTS5  |
| 126 | TIMP3    | EFEMP1   |

|     |       |        |
|-----|-------|--------|
| 127 | TIMP3 | MMP14  |
| 128 | VCAM1 | FLNC   |
| 129 | VCAN  | CXCL12 |
| 130 | VCAN  | FBLN2  |
| 131 | VCAN  | FBN1   |
| 132 | WISP1 | DCN    |

---

**Supplementary Table 6. Over-represented EMT linked Gene Ontology biological process terms in the *DNM3OS* associated protein-interaction networks**

| <b>Biological process</b>                      | <b>Number of genes</b> | <b>Nominal <i>P</i></b> | <b>Adjusted <i>P</i><sup>§</sup></b> |
|------------------------------------------------|------------------------|-------------------------|--------------------------------------|
| Extracellular matrix organization              | 24                     | 9.88E-25                | 7.33E-22                             |
| Cell substrate adhesion                        | 16                     | 1.22e-13                | 7.67E-12                             |
| Cell migration                                 | 27                     | 1.33E-13                | 7.98E-12                             |
| Cell morphogenesis involved in differentiation | 23                     | 9.29E-12                | 3.96E-10                             |

<sup>§</sup>*P*-values were adjusted using the Benjamini-Hochberg (1995) multiple testing correction method.



**Supplementary Table 7. Over-represented EMT linked pathways in the *DNM3OS* associated protein-interaction networks**

| <b>KEGG pathways</b>             | <b>Number of genes</b> | <b>Nominal <i>P</i></b> | <b>Adjusted <i>P</i><sup>§</sup></b> |
|----------------------------------|------------------------|-------------------------|--------------------------------------|
| ECM receptor interaction         | 18                     | 6.35E-32                | 2.22E-30                             |
| Focal adhesion                   | 20                     | 1.87E-28                | 3.27E-27                             |
| TGFβ signaling pathway           | 8                      | 8.33E-12                | 4.86E-11                             |
| Regulation of actin cytoskeleton | 6                      | 5.23E-06                | 2.29E-05                             |
| Gap junction                     | 3                      | 0.0008                  | 0.0016                               |
| MAPK signaling pathway           | 4                      | 0.0023                  | 0.0038                               |
| Cell adhesion molecules (CAMs)   | 3                      | 0.0026                  | 0.0041                               |
| Calcium signaling pathway        | 3                      | 0.0058                  | 0.0079                               |
| P53 signaling pathway            | 2                      | 0.0086                  | 0.0108                               |

<sup>§</sup>*P*-values were adjusted using the Benjamini-Hochberg (1995) multiple testing correction method.
