# Supplementary material for: Decoding critical long non-coding RNA in ovarian cancer epithelial-to-mesenchymal transition
Source: PubMed Central journal article supplement (PMC5693921; doi:10.1038/s41467-017-01781-0), 2017-11-17
Supplement: 41467_2017_1781_MOESM3_ESM.pdf [file 41467_2017_1781_MOESM3_ESM.pdf]

## **Description of Additional Supplementary Files**

File Name: Supplementary Data 1

Description: Ovarian cancer subtype information of TCGA patient cohort.

File Name: Supplementary Data 2

Description: Ovarian cancer subtype information of GSE9891 patient cohort.
